# Supplementary material
Source: Springer Nature journal article supplement (https://www.springermedizin.de/resource/supplementary/13024_2013_408_MOESM2_ESM.pdf/9644068)
Supplement: MOESM2 [file 9644068]

WT

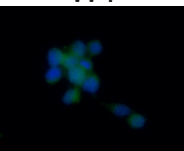

R495X

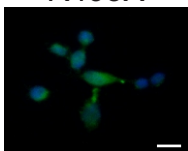

Supp Figure 2
